# Supplementary material for: Formate overflow drives toxic folate trapping in MTHFD1 inhibited cancer cells
Source: PubMed Central journal article supplement (PMC10132981; doi:10.1038/s42255-023-00771-5), 2023-04-03
Supplement: 42255_2023_771_MOESM1_ESM.pdf [file 42255_2023_771_MOESM1_ESM.pdf]

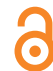

---

# Formate overflow drives toxic folate trapping in MTHFD1 inhibited cancer cells

---

In the format provided by the authors and unedited

## **Supplementary Information**

### **Formate overflow drives toxic folate trapping in MTHFD1 inhibited cancer cells**

Green et al.

- [Supplementary Methods](#)
- [Supplementary Discussion](#)
- [Supplementary Figure 1](#)

## Supplementary Methods

### Chemical Synthesis of TH9975

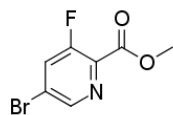

#### *methyl 5-bromo-3-fluoropyridine-2-carboxylate*

5-bromo-3-fluoropyridine-2-carboxylic acid (22 g, 100 mmol), MeOH (100 mL) and H<sub>2</sub>SO<sub>4</sub> (9.8 g, 100 mmol) were refluxed for 4 h. The reaction was allowed to cool to RT and the solvent was reduced in a rotavapor. The mixture was diluted with water. NaHCO<sub>3</sub> (aq) was added until pH ~7. The mixture was extracted with EtOAc (4x) and combined organic phases were dried over Na<sub>2</sub>SO<sub>4</sub> and removed in a rotavapor. Gave methyl 5-bromo-3-fluoropyridine-2-carboxylate (21 g, 91%). LCMS [M+H]<sup>+</sup> *m/z* 234, 236; <sup>1</sup>H NMR (400 MHz, DMSO-*d*<sub>6</sub>) δ ppm 3.89 (s, 3H), 8.42 (dd, 1H), 8.70 (t, 1H).

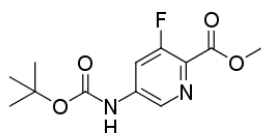

#### *methyl 5-(tert-butoxycarbonylamino)-3-fluoro-pyridine-2-carboxylate*

Methyl 5-bromo-3-fluoropyridine-2-carboxylate (2.4 g, 10 mmol), tert-butyl carbamate (1.4 g, 12 mmol), Cs<sub>2</sub>CO<sub>3</sub> (3.9 g, 12 mmol) and dry dioxane (50 mL) was flashed six times with nitrogen. Pd(OAc)<sub>2</sub> (110 mg, 0.50 mmol) and X-Phos (480 mg, 1.0 mmol) were added and the mixture was flashed six times with nitrogen. The sealed reaction was heated at 90°C for 21 h. Brine (50 mL) and water (50 mL) were added and the mixture was extracted with EtOAc. The organic solvent was removed in a rotavapor and the product was purified by flash chromatography (EtOAc/iso-hexane 25/75 to 50/50 as eluent). Gave methyl 5-[(tert-butoxy)carbonyl]amino-3-fluoropyridine-2-carboxylate (2.1 g, 76%). LCMS [M+H]<sup>+</sup> *m/z* 271; <sup>1</sup>H NMR (400 MHz, DMSO-*d*<sub>6</sub>) δ ppm 1.49 (s, 9H), 3.85 (s, 3H), 7.92 (dd, 1H), 8.50 (t, 1H), 10.28 (br s, 1H).

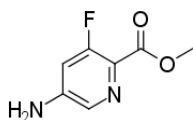

#### *methyl 5-amino-3-fluoro-pyridine-2-carboxylate*

TFA (2 mL) was added to a solution of methyl 5-(tert-butoxycarbonylamino)-3-fluoropyridine-2-carboxylate (190 mg, 0.70 mmol) in DCM (2 mL). The reaction was stirred at RT for 2 h and solvent was removed in vacuo. EtOAc (10 mL) was added to the crude material and the mixture was washed with sat. Na<sub>2</sub>CO<sub>3</sub> (2x3 mL). The organic phase was dried over Na<sub>2</sub>SO<sub>4</sub>

and removed in a rotavapor. Gave methyl 5-amino-3-fluoro-pyridine-2-carboxylate (110 mg, 92%). LCMS  $[M+H]^+$   $m/z$  171;  $^1H$  NMR (400 MHz, DMSO- $d_6$ )  $\delta$  ppm 3.76 (s, 3 H) 6.54 (s, 2 H) 6.65 - 6.73 (m, 1 H) 7.81 - 7.86 (m, 1 H).

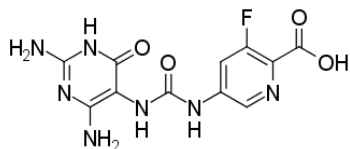

**5-[(2,4-diamino-6-oxo-1H-pyrimidin-5-yl)carbamoylamino]-3-fluoro-pyridine-2-carboxylic acid**

Methyl 5-amino-3-fluoro-pyridine-2-carboxylate (500 mg, 2.9 mmol) was added to a stirred solution of (4-nitrophenyl) carbonochloridate (590 mg, 2.9 mmol) in dry MeCN (20 mL) at 0°C. The reaction was stirred for 10 min in a sealed tube. The temperature was increased to 85°C and the reaction was stirred at this temperature for 4 h. A second solution was made by adding 5M NaOH (3.53 mL) to a water (15 mL) suspension of 2,4,5-triamino-1H-pyrimidin-6-one x H<sub>2</sub>SO<sub>4</sub> (1.4 g, 5.9 mmol). The hot organic mixture (with solid) was added to the stirred water solution over a period of 2 min at RT. The mixture was stirred at RT for 20 min and the product was collected by filtration. The material was washed with water (15 mL) and MeCN (8 mL). This gave the intermediate ester as a wet solid. LCMS  $[M+H]^+$   $m/z$  338. The material was added water (15 mL) and 5M NaOH (3.15 mL) and the reaction was stirred for 15 min at RT. Small residues of solid particles were removed by filtration. The pH of the filtrate was adjusted to ~2 by adding 12M HCl (1 mL) followed by 1M HCl. The product was collected by filtration, washed with water (10 mL) and MeCN (20 mL). The material was dried in a vacuum oven (40°C). Gave 5-[(2,4-diamino-6-oxo-1H-pyrimidin-5-yl)carbamoylamino]-3-fluoro-pyridine-2-carboxylic acid (670 mg, 71%). LCMS  $[M+H]^+$   $m/z$  324;  $^1H$  NMR (400 MHz, DMSO- $d_6$ )  $\delta$  ppm 5.99 (br. s., 2 H) 6.19 (br. s., 2 H) 6.99 (br. s., 1 H) 8.05 (d,  $J=12.32$  Hz, 1 H) 8.44 (br. s., 1 H) 9.52 (br. s., 1 H) 9.99 (br. s., 1 H) 12.98 (br. s., 1 H).

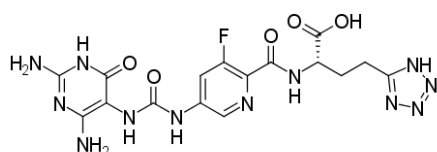

**(2S)-2-[[5-[(2,4-diamino-6-oxo-1H-pyrimidin-5-yl)carbamoylamino]-3-fluoro-pyridine-2-carboxyl]amino]-4-(1H-tetrazol-5-yl)butanoic acid (TH9975)**

5-[(2,4-diamino-6-oxo-1H-pyrimidin-5-yl)carbamoylamino]-3-fluoro-pyridine-2-carboxylic acid (450 mg, 1.4 mmol), (2S)-2-amino-4-[1-(2-cyanoethyl)-1H-1,2,3,4-tetrazol-5-yl]butanoate hydrochloride (530 mg, 1.9 mmol) (synthesis has previously been described in *Chem. Pharm. Bull.* 43(2) 230-235 (1995)), EDCI (400 mg, 2.1 mmol), HOBt (282 mg, 2.1 mmol), N,N-diisopropylethylamine (1.2 mL, 7.0 mmol) and DMSO (15 mL) was stirred at RT over night. Residues of solid particles were removed by filtration and the filtrate was purified by acidic prep-HPLC. Gave the intermediate ester/nitrile (170 mg). LCMS  $[M+H]^+$   $m/z$  544. The material was suspended in water (1 mL) and 5M NaOH (0.24 mL) was added. The reaction was stirred at RT for 20 min and at 50°C for 40 min. The pH was adjusted to ~3 with 2M HCl.

The product was collected by filtration, washed with water (4 mL) and dried in a vacuum oven (40°C) over night. Gave (2S)-2-[[5-[(2,4-diamino-6-oxo-1H-pyrimidin-5-yl)carbamoylamino]-3-fluoro-pyridine-2-carbonyl]amino]-4-(1H-tetrazol-5-yl)butanoic acid (115 mg, 17%). LCMS  $[M+H]^+$   $m/z$  477;  $^1H$  NMR (400 MHz, DMSO- $d_6$ )  $\delta$  ppm 2.14 - 2.42 (m, 2 H) 2.85 - 3.03 (m, 2 H) 4.40 - 4.54 (m, 1 H) 5.99 (br. s., 2 H) 6.19 (br. s., 2 H) 6.97 (br. s., 1 H) 8.04 (d,  $J=13.3$  Hz, 1 H) 8.47 (br. s., 1 H) 8.68 (d,  $J=8.1$  Hz, 1 H) 9.50 (br. s., 1 H) 9.99 (br. s., 1 H) 12.89 (br. s., 1 H) 15.98 (br. s., 1 H).

## Supplementary Discussion

In the context of HPLM, it has been suggested that hypoxanthine can exert toxicity by inhibiting uridine monophosphate synthase (UMPS).<sup>32</sup> We thus speculated that UMPS inhibition might also contribute to the observed MTHFD inhibitor toxicity that is exacerbated in presence of hypoxanthine (Extended Data Fig. 5e). To test this hypothesis, we investigated whether uric acid or a UMPS inhibitor (pyrazofurin) could mimic hypoxanthine sensitization, and whether hypoxanthine sensitization could be reversed with xanthine oxidase inhibitors (allopurinol and febuxostat) or deoxyuridine. However, 350  $\mu\text{M}$  uric acid had no effect on TH9619 toxicity (Extended Data Fig. 5f) and while pyrazofurin displayed a small additive effect with TH9619, the sensitization did not compare to the effect of hypoxanthine (Extended Data Fig. 5g). Moreover, deoxyuridine did not rescue toxicity, the UMPS substrate orotate had no effect (Fig. 5h) and allopurinol and febuxostat did not reverse hypoxanthine sensitization (Fig. 5i). We also proposed that production of  $\text{H}_2\text{O}_2$  may contribute to toxicity via induction of reactive oxygen species through hypoxanthine conversion to uric acid, however, 100  $\mu\text{M}$   $\text{H}_2\text{O}_2$  had no effect on TH9619 toxicity (Extended Data Fig. 5j). Finally, no increase in uric acid concentrations following addition of hypoxanthine was observed (Extended Data Fig. 5k).

Supplementary Figure 1

a

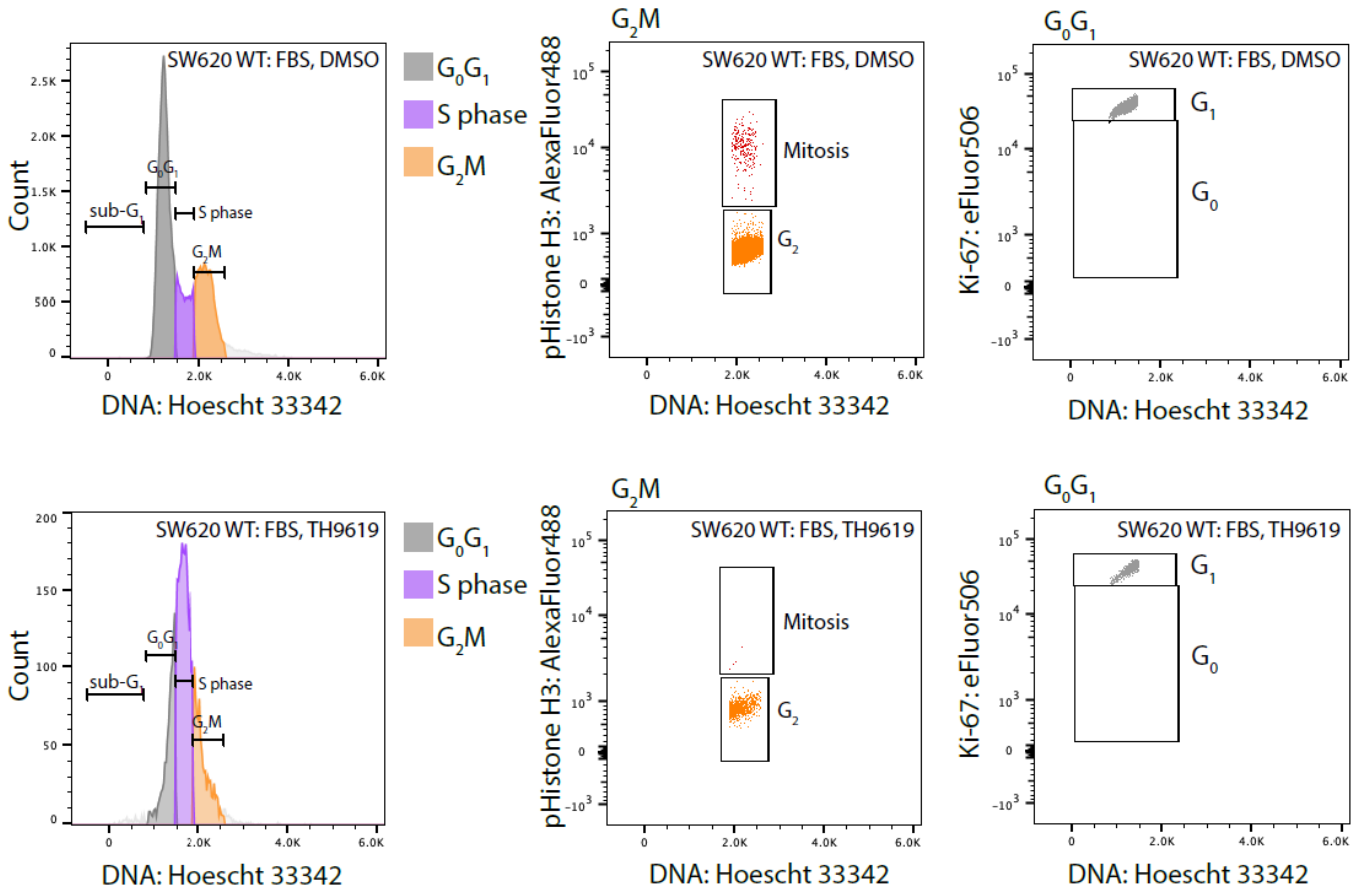

b

SW620 WT untreated Control  
Annexin-V PI

| Gate         | %Parent | Cell Count |
|--------------|---------|------------|
| All          | 100     | 50000      |
| Total        | 91.5    | 45742      |
| Single Cells | 91.1    | 41666      |

| Gate | Staining    | %Parent |
|------|-------------|---------|
| Q1   | PI          | 0.0096  |
| Q2   | AnnexinV/PI | 0.58    |
| Q3   | AnnexinV    | 0.91    |
| Q4   | Viable      | 98.5    |

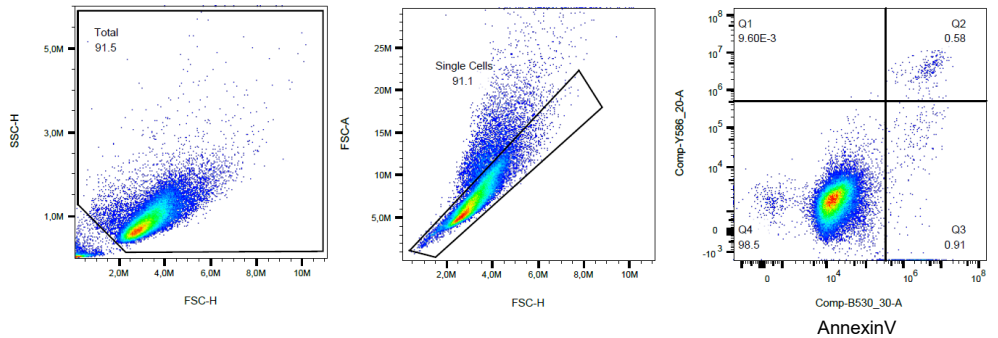

SW620 WT 24h TH9619  
Annexin-V PI

| Gate         | %Parent | Cell Count |
|--------------|---------|------------|
| All          | 100     | 50000      |
| Total        | 64.6    | 32288      |
| Single Cells | 94.1    | 30392      |

| Gate | Staining    | %Parent |
|------|-------------|---------|
| Q1   | PI          | 0.14    |
| Q2   | AnnexinV/PI | 9.36    |
| Q3   | AnnexinV    | 11.3    |
| Q4   | Viable      | 79.2    |

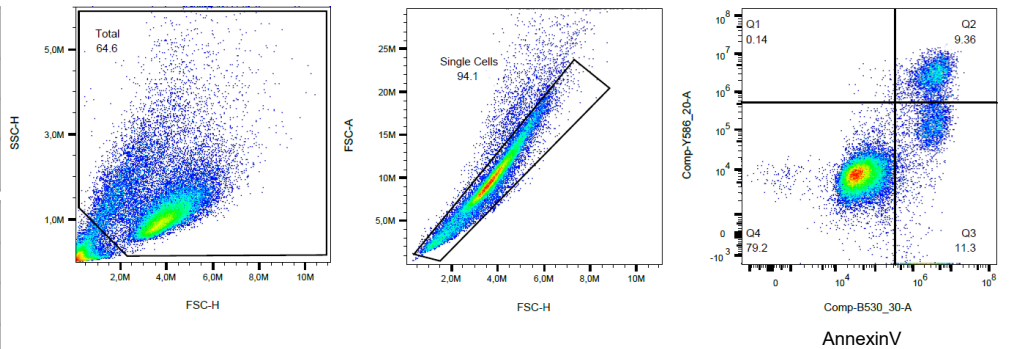

### **Supplementary Figure 1. Flow Cytometry Gating Strategy.**

General gating strategy for all analyses: 1) Exclusion of debris by forward (FSC) and side (SSC) scatter. 2) Removal of cell doublets and other cell aggregates by either time-of-flight (TOF) gating (for cell cycle analysis) or FSC-A vs FSC-H gating (for apoptosis analysis).

(a) Cell cycle analysis was determined by DNA content analysis using Hoescht33342 (distinguishing cells in G<sub>0</sub>G<sub>1</sub>, S phase and G<sub>2</sub>M). Cells were then separated into G<sub>1</sub> (Ki-67+) and G<sub>0</sub> (Ki-67-) and mitotic cells were identified by expression of phosphor-histone H3.

(b) Apoptotic cell death was determined using AnnexinV and PI double staining. Cells were then separated using a quadrant gate into four subpopulations PI+, AnnexinV+/PI+, AnnexinV+ and viable (AnnexinV-/PI-) cell populations for analysis. For (a) and (b) quantitative and statistical analysis was performed on these distinct cell populations. An exemplary gating scheme is given above for each type of flow cytometry experiment performed in this study.
