# Supplementary material for: Formate overflow drives toxic folate trapping in MTHFD1 inhibited cancer cells
Source: PubMed Central journal article supplement (PMC10132981; doi:10.1038/s42255-023-00771-5), 2023-04-03

Source Data - Unprocessed images of Western blots related to Figure 1j.

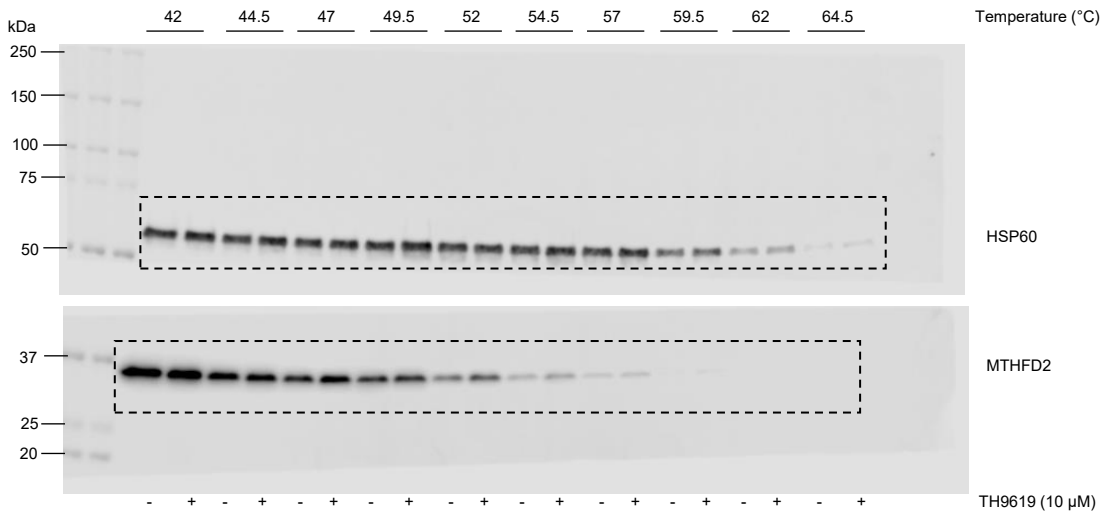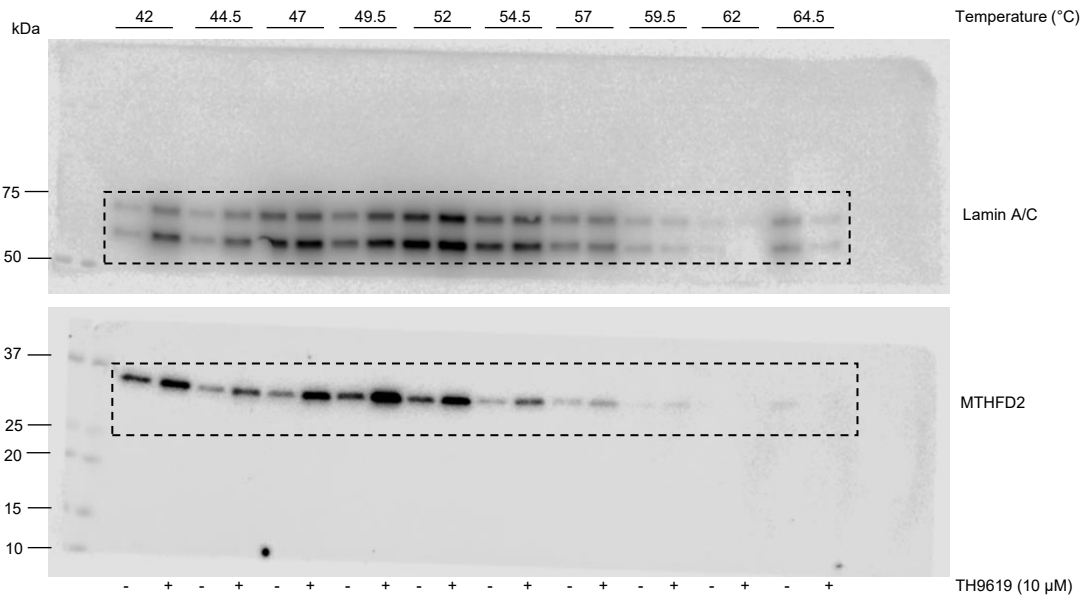

Supplement: 42255_2023_771_MOESM6_ESM.pdf [file 42255_2023_771_MOESM6_ESM.pdf]
